# Supplementary material
Source: Elsevier journal article supplement (https://comptes-rendus.academie-sciences.fr/chimie/article/10.1016/j.crci.2011.09.008/file/attach/mmc1.pdf)

## Functionalisation of Mesoporous Silica Nanoparticles with 3-Isocyanatopropyltrichlorosilane.

## Fonctionalisation de Nanoparticules de Silice Mésoporeuses avec le 3-Isocyanatopropyltrichlorosilane

*Wassim El Malti, Olivier Mongin, Mireille Blanchard-Desce, Laurence Raehm, Jean-Olivier Durand\**

Boc-Hydrazine

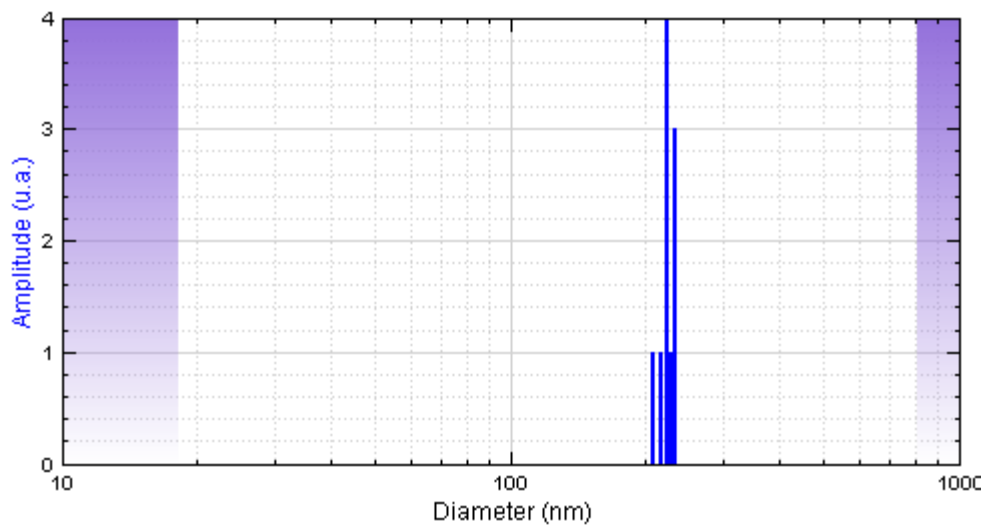

Dodecylamine

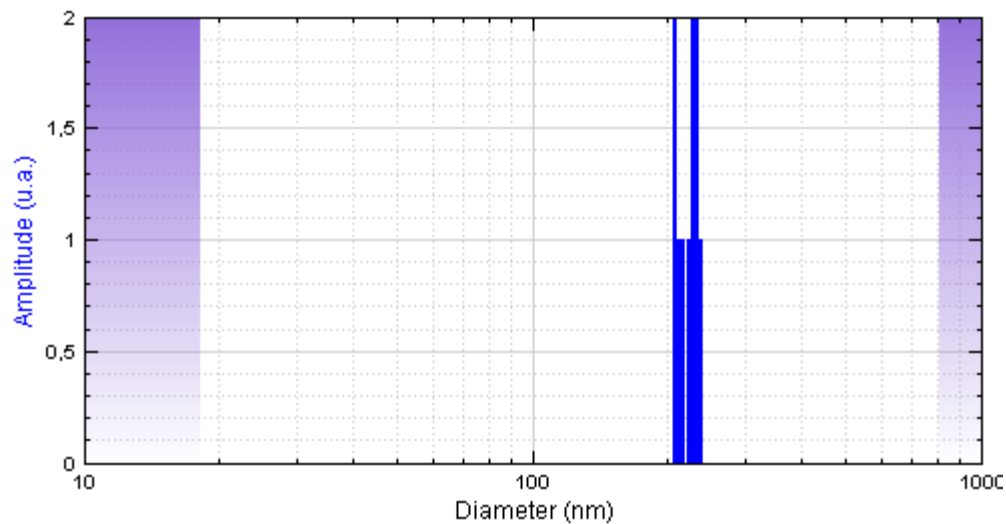

Supplement: mmc1 [file mmc1.pdf]
